# Supplementary material for: Continuous positive airway pressure to avoid intubation in SARS-CoV-2 pneumonia: a two-period retrospective case-control study
Source: PubMed Central journal article supplement — Eur Respir J. 2020 Aug 13;56(2):2001692. doi: 10.1183/13993003.01692-2020 (PMC7241113; doi:10.1183/13993003.01692-2020), 2020-08-13
Supplement: ERJ-01692-2020.Shareable.pdf [file ERJ-01692-2020.Shareable.pdf]

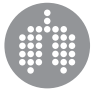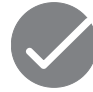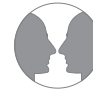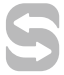

SHAREABLE PDF

# Continuous positive airway pressure to avoid intubation in SARS-CoV-2 pneumonia: a two-period retrospective case-control study

Mathilde Oranger<sup>1,4</sup>, Jésus Gonzalez-Bermejo <sup>1,2,4</sup>, Philippine Dacosta-Noble<sup>1</sup>, Claudia Llontop<sup>1</sup>, Antoine Guerder<sup>1</sup>, Valery Trosini-Desert<sup>1</sup>, Morgane Faure<sup>1</sup>, Mathieu Raux<sup>2,3</sup>, Maxens Decavele<sup>1</sup>, Alexandre Demoule<sup>1,2</sup>, Capucine Morélot-Panzini<sup>1,2,5</sup> and Thomas Similowski<sup>1,2,5</sup>

**Affiliations:** <sup>1</sup>AP-HP, Groupe Hospitalier Universitaire AHP-Sorbonne Université, site Pitié-Salpêtrière, Service de Pneumologie, Médecine Intensive et Réanimation (Département R3S), Paris, France. <sup>2</sup>Sorbonne Université, INSERM, UMRS1158 Neurophysiologie Respiratoire Expérimentale et Clinique, Paris, France. <sup>3</sup>AP-HP, Groupe Hospitalier Universitaire AHP-Sorbonne Université, site Pitié-Salpêtrière, Département d'Anesthésie et Réanimation, Paris, France. <sup>4</sup>M. Oranger and J. Gonzalez-Bermejo contributed equally and are both first authors. <sup>5</sup>C. Morélot-Panzini and T. Similowski contributed equally and are both last authors.

**Correspondence:** Thomas Similowski, Service de Pneumologie, Médecine Intensive et Réanimation, Groupe Hospitalier Pitié Salpêtrière Charles Foix, 47-83 boulevard de l'Hôpital, 75651 PARIS Cedex 13, France. E-mail: thomas.similowski@upmc.fr

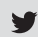

@ERSpublications

**COVID-19 pneumonia can be life-threatening. Given the unprecedented burden placed on ICU resources by the epidemic, avoiding intubation is a major issue. This study suggests that CPAP can achieve this objective.** <https://bit.ly/2X4Q8Zj>

**Cite this article as:** Oranger M, Gonzalez-Bermejo J, Dacosta-Noble P, *et al.* Continuous positive airway pressure to avoid intubation in SARS-CoV-2 pneumonia: a two-period retrospective case-control study. *Eur Respir J* 2020; 56: 2001692 [<https://doi.org/10.1183/13993003.01692-2020>].

This single-page version can be shared freely online.

*To the Editor:*

Severe acute respiratory syndrome coronavirus 2 (SARS-CoV-2) can cause severe pneumonia requiring invasive mechanical ventilation [1], in the context of atypical acute respiratory distress syndrome (ARDS) [2]. The magnitude of the epidemic places an unprecedented pressure on intensive care units (ICUs), making avoidance of intubation a critical issue.
